# Supplementary material for: Measles Elimination: Identifying Susceptible Sub-Populations to Tailor Immunization Strategies
Source: Viruses. 2019 Aug 20;11(8):765. doi: 10.3390/v11080765 (PMC6723762; doi:10.3390/v11080765)
Supplement: Supplementary file 1 [file viruses-11-00765-s001.xlsx]

## Sheet: seroprevalence_data
immun	bcoh	sex	district
1	1967	F	Innsbruck-Stadt
1	1958	M	Innsbruck-Land
1	1986	M	Landeck
1	1952	M	Landeck
1	1988	M	Innsbruck-Land
1	1941	F	Innsbruck-Land
1	1979	M	Innsbruck-Stadt
1	1967	M	Innsbruck-Land
0	1975	M	Innsbruck-Land
1	1957	M	Schwaz
1	1992	M	Landeck
1	1948	F	Innsbruck-Stadt
1	1976	F	Innsbruck-Land
1	1979	F	Kitzbühel
1	1970	F	Kitzbühel
0	1976	F	Innsbruck-Land
1	1983	F	Innsbruck-Land
1	1952	F	Imst
1	1965	F	Landeck
1	1990	F	Landeck
1	1987	M	Schwaz
1	1962	F	Innsbruck-Stadt
1	1953	F	Kufstein
1	1972	M	Kufstein
1	1952	M	Reutte
1	1937	F	Innsbruck-Stadt
1	1962	F	Innsbruck-Stadt
1	1965	F	Schwaz
1	1980	F	Innsbruck-Stadt
0	1992	F	Innsbruck-Land
1	1975	F	Kufstein
1	1950	F	Imst
1	1988	M	Innsbruck-Stadt
1	1995	M	Schwaz
1	1956	M	Kitzbühel
1	1983	F	Innsbruck-Land
1	1930	F	Schwaz
1	1959		Innsbruck-Stadt
1	1988	M	Innsbruck-Stadt
1	1947	F	Innsbruck-Stadt
1	1970	F	Kufstein
1	1964	F	Imst
1	1967	F	Innsbruck-Land
1	1968	F	Innsbruck-Land
1	1966	M	Innsbruck-Stadt
1	1941	M	Kufstein
1	1988	M	Schwaz
1	1949	F	Innsbruck-Stadt
0	1968	F	Innsbruck-Stadt
0	1981	F	Innsbruck-Stadt
1	1923	F	Kufstein
1	1977	M	Kufstein
1	1942	F	Innsbruck-Stadt
1	1995	M	Innsbruck-Stadt
1	1993	M	Imst
1	1944	F	Innsbruck-Stadt
1	1974	F	Innsbruck-Stadt
1	1951	F	Innsbruck-Land
1	1989	F	Innsbruck-Land
1	1955	F	Reutte
1	1969	M	Innsbruck-Stadt
0	1984	M	Innsbruck-Land
1	1960	F	Imst
1	1940	M	Reutte
1	1967	F	Innsbruck-Stadt
1	1986	F	Innsbruck-Land
1	1964	M	Innsbruck-Stadt
1	1990	M	Kufstein
0	1978	F	Innsbruck-Stadt
1	1988	F	Innsbruck-Stadt
1	1976	F	Kufstein
1	1981	F	Kitzbühel
1	1985	M	Kitzbühel
1	1983	M	Imst
1	1924	F	Innsbruck-Stadt
1	1939	M	Innsbruck-Land
1	1995	M	Kufstein
1	1954	F	Landeck
1	1968	M	Innsbruck-Stadt
1	1940	M	Innsbruck-Land
1	1985	M	Innsbruck-Land
1	1990	M	Schwaz
0	1975	M	Schwaz
1	1930	F	Innsbruck-Stadt
1	1967	F	Innsbruck-Stadt
1	1940	F	Innsbruck-Land
1	1956	M	Innsbruck-Stadt
1	1972	F	Innsbruck-Land
1	1984	F	Innsbruck-Land
1	1930	M	Innsbruck-Stadt
1	1955	M	Innsbruck-Land
1	1967	F	Innsbruck-Land
1	1976	F	Innsbruck-Land
1	1968	F	Imst
0	1986	M	Innsbruck-Land
1	1959	M	Innsbruck-Land
1	1965	M	Kufstein
0	1983	F	Reutte
1	1983	M	Innsbruck-Stadt
1	1963	M	Innsbruck-Land
1	1963	M	Kufstein
1	1983	F	Reutte
1	1969	M	Innsbruck-Stadt
0	1996	M	Innsbruck-Stadt
1	1990	M	Innsbruck-Land
1	1994	M	Imst
1	1964	F	Kufstein
1	1990	F	Landeck
1	1972	F	Innsbruck-Land
1	1974	F	Imst
1	1963	M	Innsbruck-Land
1	1934	M	Landeck
1	1935	M	Innsbruck-Stadt
1	1986	M	Reutte
1	1926	M	Innsbruck-Land
0	1990	M	Innsbruck-Land
1	1933	F	Imst
1	1967	M	Innsbruck-Stadt
1	1971	M	Innsbruck-Land
1	1962	F	Kufstein
1	1969	M	Innsbruck-Stadt
1	1990	F	Reutte
1	1959	M	Innsbruck-Land
0	1996	M	Kitzbühel
0	1994	F	Innsbruck-Land
1	1963	M	Innsbruck-Land
1	1979	M	Schwaz
1	1992	M	Kufstein
1	1995	M	Innsbruck-Land
0	1966	M	Kitzbühel
1	1987	F	Kufstein
1	1970	F	Kufstein
0	1995	F	Landeck
0	1992		Reutte
0	1986	M	Schwaz
1	1990	M	Imst
1	1975	M	Landeck
1	1919	M	Landeck
1	1967	F	Innsbruck-Stadt
1	1985	M	Kufstein
1	1928	F	Innsbruck-Land
0	1996	M	Landeck
1	1950	F	Lienz
1	1955	M	Schwaz
1	1962	F	Innsbruck-Stadt
1	1979	M	Innsbruck-Land
1	1955	M	Innsbruck-Land
1	1966	F	Innsbruck-Stadt
1	1971	F	Schwaz
1	1967	F	Kufstein
1	1931	F	Innsbruck-Land
1	1964	F	Schwaz
1	1934	F	Kufstein
1	1962	F	Kitzbühel
1	1974	M	Schwaz
1	1941	F	Innsbruck-Stadt
0	1932	F	Innsbruck-Land
0	1991	F	Kufstein
1	1972	F	Innsbruck-Land
1	1993	M	Innsbruck-Land
1	1948	M	Kufstein
1	1990	M	Imst
1	1933	F	Innsbruck-Stadt
1	1926	F	Schwaz
1	1952	F	Innsbruck-Land
1	1984	F	Landeck
1	1971	F	Kufstein
0	1978	M	Schwaz
1	1981	F	Kufstein
1	1967	F	Kufstein
0	1953	F	Kufstein
1	1939	M	Schwaz
1	1980	M	Innsbruck-Land
1	1985	M	Reutte
1	1953	M	Innsbruck-Land
1	1965	M	Schwaz
1	1943	M	Innsbruck-Land
1	1949	M	Innsbruck-Stadt
1	1995	M	Innsbruck-Land
1	1926	M	Kitzbühel
0	1980	F	Innsbruck-Land
1	1949	M	Kufstein
1	1974	M	Imst
1	1958	M	Reutte
1	1943	M	Reutte
1	1958	M	Kufstein
1	1984	M	Imst
1	1969	M	Reutte
1	1995	F	Innsbruck-Land
1	1950	F	Innsbruck-Land
1	1978	F	Reutte
1	1995	M	Innsbruck-Land
1	1978	F	Innsbruck-Stadt
1	1978	M	Innsbruck-Land
1	1980	M	Innsbruck-Land
1	1952	F	Kitzbühel
1	1990	M	Innsbruck-Land
1	1949	M	Innsbruck-Land
1	1988	M	Schwaz
1	1945	F	Innsbruck-Stadt
1	1944	F	Schwaz
1	1953	M	Innsbruck-Land
1	1979	M	Innsbruck-Land
0	1984	F	Kufstein
1	1986	F	Innsbruck-Stadt
1	1967	F	Kufstein
1	1973	F	Innsbruck-Stadt
1	1980	F	Innsbruck-Stadt
1	1969	F	Reutte
1	1971	F	Innsbruck-Land
1	1982	F	Landeck
1	1989	F	Lienz
1	1938	F	Innsbruck-Stadt
1	1971	F	Innsbruck-Stadt
0	1995	M	Landeck
1	1981	F	Innsbruck-Land
1	1993	M	Schwaz
1	1973	F	Innsbruck-Stadt
1	1990	F	Innsbruck-Stadt
1	1984	F	Innsbruck-Stadt
1	1973	F	Innsbruck-Land
0	1977	M	Innsbruck-Stadt
1	1956	M	Innsbruck-Stadt
1	1987	F	Innsbruck-Stadt
1	1979	F	Innsbruck-Stadt
1	1925	F	Innsbruck-Stadt
1	1944	F	Innsbruck-Stadt
1	1972	F	Innsbruck-Land
1	1983	F	Innsbruck-Land
1	1972	F	Imst
1	1963	F	Kitzbühel
1	1944	F	Innsbruck-Stadt
1	1945	F	Innsbruck-Land
1	1969	F	Innsbruck-Stadt
1	1963	F	Innsbruck-Stadt
1	1971	M	Innsbruck-Land
1	1957	M	Innsbruck-Land
1	1975	F	Kitzbühel
1	1940	F	Reutte
1	1948	M	Schwaz
1	1960	F	Schwaz
1	1920	F	Kufstein
1	1965	M	Schwaz
1	1986	M	Lienz
1	1972	F	Innsbruck-Stadt
1	1977	F	Innsbruck-Stadt
1	1983	F	Innsbruck-Stadt
1	1953	M	Kitzbühel
1	1965	F	Innsbruck-Land
1	1968	F	Kufstein
1	1962	F	Innsbruck-Stadt
1	1957	F	Kitzbühel
1	1963	F	Innsbruck-Land
1	1944	F	Innsbruck-Land
1	1969	F	Lienz
1	1970	F	Innsbruck-Stadt
1	1967	F	Kufstein
1	1942	F	Kitzbühel
1	1989	M	Innsbruck-Land
1	1974	F	Innsbruck-Land
1	1985	M	Innsbruck-Land
1	1944	M	Reutte
1	1988	F	Reutte
1	1973	M	Innsbruck-Stadt
1	1947	M	Schwaz
1	1958	M	Innsbruck-Stadt
1	1988	F	Kufstein
1	1950	F	Imst
1	1955	F	Imst
1	1963	F	Schwaz
1	1980	F	Schwaz
1	1967	F	Landeck
1	1966	M	Innsbruck-Land
0	1993	F	Innsbruck-Stadt
1	1988	M	Innsbruck-Stadt
1	1977	F	Innsbruck-Stadt
1	1990	F	Innsbruck-Land
1	1988	M	Schwaz
1	1981	M	Kufstein
1	1992	F	Schwaz
1	1974	M	Lienz
0	1940	M	Landeck
1	1958	F	Innsbruck-Stadt
1	1966	F	Innsbruck-Stadt
1	1943	F	Innsbruck-Land
1	1975	F	Schwaz
1	1952	M	Innsbruck-Stadt
1	1986	M	Innsbruck-Land
1	1973	M	Innsbruck-Land
1	1943	M	Innsbruck-Land
1	1984	M	Innsbruck-Land
1	1980	F	Imst
1	1971	F	Innsbruck-Stadt
1	1949	F	Schwaz
1	1997	F	Kufstein
1	1993	M	Kitzbühel
1	1952	M	Innsbruck-Land
1	1965	M	Kitzbühel
1	1935	F	Kufstein
1	1944	M	Innsbruck-Land
1	1957	F	Innsbruck-Land
1	1966	F	Imst
1	1988	M	Innsbruck-Stadt
1	1965	M	Innsbruck-Land
1	1963	F	Schwaz
1	1968	F	Innsbruck-Land
1	1988	F	Kufstein
1	1969	M	Innsbruck-Land
1	1985	M	Innsbruck-Stadt
1	1951	M	Kitzbühel
1	1974	F	Innsbruck-Land
1	1970	F	Imst
1	1988	F	Innsbruck-Land
1	1961	F	Innsbruck-Land
1	1991	M	Imst
1	1977	F	Innsbruck-Stadt
1	1962	F	Innsbruck-Land
1	1944	F	Kufstein
1	1982	F	Innsbruck-Stadt
1	1977	F	Innsbruck-Land
1	1991	F	Innsbruck-Land
1	1990	M	Kufstein
1	1995	F	Innsbruck-Land
1	1967	F	Innsbruck-Stadt
1	1966	F	Innsbruck-Land
1	1978	M	Innsbruck-Stadt
1	1989		Imst
1	1944	F	Innsbruck-Stadt
0	1986	M	Reutte
1	1988	M	Reutte
1	1920	F	Lienz
1	1983	F	Kitzbühel
1	1966	F	Kitzbühel
1	1930	M	Innsbruck-Stadt
1	1970	M	Innsbruck-Stadt
1	1982	M	Innsbruck-Stadt
1	1987	M	Kitzbühel
1	1963	F	Innsbruck-Land
1	1936	F	Reutte
1	1979	F	Innsbruck-Stadt
1	1981	M	Landeck
1	1950	F	Innsbruck-Stadt
1	1977	F	Innsbruck-Land
1	1975	F	Innsbruck-Stadt
1	1957	F	Kufstein
1	1964	M	Innsbruck-Stadt
1	1954	F	Innsbruck-Land
1	1991	M	Innsbruck-Land
1	1923	M	Innsbruck-Land
1	1991	M	Innsbruck-Stadt
1	1929	M	Schwaz
1	1943	F	Lienz
1	1917	M	Innsbruck-Land
1	1944	M	Lienz
0	1985	M	Innsbruck-Land
1	1974	F	Imst
1	1970	M	Imst
1	1975	F	Innsbruck-Land
1	1921	F	Imst
1	1967	F	Reutte
1	1981	F	Innsbruck-Stadt
0	1973	M	Innsbruck-Stadt
1	1925	M	Schwaz
1	1985	F	Innsbruck-Stadt
1	1964	M	Reutte
1	1964	F	Landeck
0	1982	F	Innsbruck-Stadt
1	1986	F	Kufstein
1	1970	M	Schwaz
1	1960	F	Schwaz
1	1976	F	Reutte
1	1920	F	Imst
1	1974	M	Innsbruck-Land
1	1944	F	Innsbruck-Stadt
1	1962	F	Innsbruck-Stadt
1	1966	F	Innsbruck-Land
1	1958	M	Innsbruck-Stadt
1	1990	M	Innsbruck-Land
1	1969	F	Kitzbühel
1	1942	F	Innsbruck-Land
1	1986	M	Kitzbühel
1	1995	M	Kitzbühel
1	1989	F	Innsbruck-Land
1	1968	M	Innsbruck-Land
1	1942	M	Reutte
1	1926	F	Landeck
1	1958	F	Imst
1	1956	F	Imst
0	1973	M	Innsbruck-Stadt
1	1964	F	Kitzbühel
1	1971	M	Innsbruck-Stadt
1	1994	M	Lienz
1	1973	M	Kufstein
1	1989	F	Kufstein
1	1928	F	Lienz
1	1979	F	Innsbruck-Land
1	1969	F	Schwaz
1	1992	F	Lienz
1	1963	F	Innsbruck-Stadt
1	1986	M	Innsbruck-Land
1	1956	F	Innsbruck-Stadt
1	1981	F	Schwaz
1	1950	F	Imst
1	1970	F	Innsbruck-Stadt
1	1988	M	Imst
1	1992	F	Innsbruck-Stadt
0	1991	M	Innsbruck-Land
1	1927	M	Innsbruck-Land
1	1959	F	Innsbruck-Stadt
1	1979	F	Innsbruck-Stadt
0	1984	F	Reutte
1	1989	F	Lienz
1	1964	F	Innsbruck-Land
1	1985	M	Innsbruck-Land
1	1969	F	Kufstein
1	1975	F	Kitzbühel
1	1964	F	Imst
1	1989	F	Reutte
1	1970	M	Reutte
1	1957	F	Innsbruck-Stadt
1	1997	M	Innsbruck-Land
1	1985	M	Kufstein
1	1969	M	Innsbruck-Land
1	1945	M	Kufstein
1	1923	F	Lienz
1	1966	F	Innsbruck-Land
1	1980	F	Lienz
1	1940	M	Innsbruck-Stadt
1	1977	F	Imst
1	1986	F	Kufstein
1	1922	F	Kufstein
1	1927	M	Innsbruck-Stadt
1	1981	M	Reutte
1	1992	M	Schwaz
1	1967	M	Kufstein
1	1983	M	Innsbruck-Land
1	1921	F	Landeck
1	1982	F	Innsbruck-Land
1	1970	F	Innsbruck-Stadt
0	1991	F	Landeck
1	1983	F	Lienz
1	1963	F	Innsbruck-Land
1	1967	F	Innsbruck-Land
1	1938	F	Schwaz
1	1959	F	Innsbruck-Stadt
1	1926	F	Innsbruck-Land
1	1945	M	Schwaz
1	1969	F	Innsbruck-Land
0	1997	F	Reutte
1	1939	F	Innsbruck-Land
1	1980	M	Schwaz
1	1976	M	Schwaz
1	1987	M	Reutte
1	1969	F	Innsbruck-Stadt
1	1959	M	Kufstein
1	1961	F	Innsbruck-Stadt
1	1956	F	Innsbruck-Land
1	1940	M	Kufstein
1	1946	F	Innsbruck-Stadt
0	1996	M	Landeck
1	1972	F	Innsbruck-Stadt
1	1988	F	Innsbruck-Stadt
1	1986	M	Innsbruck-Stadt
1	1990	F	Innsbruck-Stadt
1	1989	M	Schwaz
1	1971	F	Schwaz
1	1963	M	Lienz
1	1970	F	Innsbruck-Stadt
1	1984	F	Innsbruck-Land
1	1962	F	Kufstein
1	1973	F	Lienz
1	1970	F	Landeck
1	1976	F	Innsbruck-Land
1	1968	F	Innsbruck-Stadt
1	1939	F	Imst
1	1978	M	Reutte
1	1971	M	Lienz
1	1973	M	Innsbruck-Stadt
1	1972	F	Kufstein
1	1968	F	Kitzbühel
0	1970	F	Innsbruck-Stadt
1	1966	M	Innsbruck-Land
1	1927	M	Lienz
1	1988	M	Innsbruck-Stadt
1	1964	M	Kufstein
1	1976	M	Kufstein
1	1962	M	Imst
1	1982	F	Imst
1	1976	M	Kufstein
1	1923	F	Innsbruck-Land
1	1977	F	Innsbruck-Land
1	1934	F	Reutte
1	1988	F	Innsbruck-Stadt
1	1967	M	Kufstein
1	1932	F	Innsbruck-Land
1	1944	M	Innsbruck-Stadt
1	1968	M	Innsbruck-Stadt
1	1961	F	Innsbruck-Stadt
1	1971	F	Reutte
1	1967	F	Schwaz
1	1968	F	Imst
1	1952	F	Imst
1	1992	F	Innsbruck-Stadt
1	1922	F	Innsbruck-Stadt
1	1941	M	Kufstein
1	1970	F	Innsbruck-Stadt
1	1943	F	Innsbruck-Land
1	1965	F	Reutte
1	1976	F	Reutte
1	1992	M	Innsbruck-Land
1	1943	M	Schwaz
1	1930	M	Innsbruck-Land
1	1949	F	Innsbruck-Stadt
1	1977	F	Reutte
1	1951	M	Innsbruck-Land
1	1935	F	Kufstein
1	1943	F	Innsbruck-Land
1	1950	F	Innsbruck-Land
1	1983	F	Lienz
1	1957	M	Innsbruck-Land
1	1988	M	Kufstein
1	1931	M	Reutte
1	1961	F	Kufstein
1	1971	F	Innsbruck-Land
1	1984	F	Kufstein
1	1953	F	Kufstein
1	1962	F	Innsbruck-Land
1	1949	M	Kufstein
1	1921	F	Innsbruck-Stadt
1	1941	M	Innsbruck-Stadt
1	1941	M	Innsbruck-Land
1	1990	F	Reutte
1	1938	M	Innsbruck-Land
1	1977	F	Innsbruck-Land
1	1968	F	Innsbruck-Land
1	1969	M	Innsbruck-Land
1	1963	F	Innsbruck-Land
1	1985	F	Kitzbühel
1	1987	F	Imst
1	1927	F	Kitzbühel
1	1940	F	Innsbruck-Stadt
1	1957	M	Innsbruck-Land
1	1995	M	Reutte
1	1971	F	Innsbruck-Land
0	1996	F	Imst
1	1973	F	Kufstein
1	1988	M	Lienz
1	1993	M	Reutte
1	1959	F	Reutte
1	1967	F	Innsbruck-Land
1	1979	M	Schwaz
1	1939	F	Innsbruck-Stadt
1	1981	F	Schwaz
1	1966	F	Innsbruck-Stadt
1	1972	F	Kufstein
1	1985	F	Innsbruck-Land
1	1990	F	Innsbruck-Land
1	1947	F	Kufstein
1	1940	F	Kitzbühel
1	1976	F	Innsbruck-Stadt
1	1973	F	Innsbruck-Land
1	1960	F	Innsbruck-Stadt
1	1964	F	Imst
1	1978	F	Landeck
1	1994	F	Innsbruck-Land
1	1975	M	Innsbruck-Stadt
1	1965	M	Kufstein
1	1995	M	Kitzbühel
1	1969	F	Kufstein
0	1996	F	Innsbruck-Stadt
1	1960	M	Kufstein
1	1964	M	Innsbruck-Stadt
1	1957	F	Schwaz
1	1940	F	Innsbruck-Stadt
1	1948	F	Innsbruck-Stadt
1	1993	F	Innsbruck-Stadt
1	1932	F	Innsbruck-Land
1	1964	F	Innsbruck-Land
1	1931	F	Innsbruck-Land
1	1976	F	Innsbruck-Land
1	1975	F	Innsbruck-Land
1	1960	F	Innsbruck-Stadt
1	1955	F	Kitzbühel
1	1942	M	Innsbruck-Land
1	1923	F	Imst
1	1972	F	Schwaz
1	1973	M	Innsbruck-Land
1	1966	M	Schwaz
1	1985	F	Innsbruck-Land
1	1953	F	Kufstein
1	1983	M	Innsbruck-Stadt
1	1930	M	Innsbruck-Stadt
1	1996	M	Schwaz
1	1927	M	Imst
1	1965	F	Lienz
1	1961	M	Innsbruck-Land
1	1987	F	Innsbruck-Land
1	1994	F	Innsbruck-Land
1	1942	F	Innsbruck-Land
1	1970	M	Innsbruck-Stadt
1	1986	F	Innsbruck-Stadt
1	1985	M	Kufstein
1	1973	F	Innsbruck-Stadt
1	1977	F	Innsbruck-Land
1	1980	F	Schwaz
1	1966	M	Kufstein
1	1972	F	Innsbruck-Land
1	1980	F	Reutte
1	1975	F	Innsbruck-Stadt
1	1969	F	Kufstein
1	1965	F	Innsbruck-Land
1	1975	M	Innsbruck-Stadt
1	1967	F	Innsbruck-Stadt
1	1960	F	Innsbruck-Stadt
1	1978	F	Innsbruck-Land
1	1972	F	Innsbruck-Stadt
1	1973	F	Schwaz
1	1957	F	Kufstein
1	1968	F	Innsbruck-Land
1	1977	F	Innsbruck-Land
1	1991	M	Schwaz
1	1929	M	Lienz
1	1966	F	Innsbruck-Land
1	1938	M	Imst
1	1985	F	Kufstein
0	1997	M	Kufstein
1	1979	F	Imst
1	1975	F	Innsbruck-Stadt
1	1983	M	Kitzbühel
1	1959	M	Innsbruck-Land
1	1966	M	Innsbruck-Stadt
1	1993	M	Innsbruck-Stadt
1	1929	F	Kufstein
1	1967	F	Kufstein
1	1969	F	Innsbruck-Land
1	1981	F	Innsbruck-Land
1	1940	M	Kufstein
1	1994	F	Innsbruck-Land
1	1984	M	Innsbruck-Land
1	1959	F	Innsbruck-Land
1	1938	F	Innsbruck-Land
1	1972	F	Kufstein
1	1966	F	Schwaz
1	1971	M	Innsbruck-Land
1	1962	M	Innsbruck-Stadt
0	1984	M	Schwaz
1	1983	M	Innsbruck-Stadt
1	1939	F	Innsbruck-Land
1	1993	F	Innsbruck-Stadt
1	1945	F	Imst
1	1940	F	Innsbruck-Land
1	1948	F	Schwaz
1	1946	F	Innsbruck-Stadt
1	1993	F	Reutte
1	1979	F	Innsbruck-Land
1	1957	F	Innsbruck-Land
1	1990	M	Imst
1	1940	F	Innsbruck-Stadt
1	1953	M	Kufstein
1	1972	M	Kitzbühel
1	1935	F	Innsbruck-Stadt
1	1937	F	Innsbruck-Stadt
1	1974	F	Innsbruck-Stadt
1	1964	F	Schwaz
1	1963	M	Innsbruck-Land
1	1955	M	Innsbruck-Stadt
1	1936	M	Lienz
1	1927	F	Kufstein
1	1976	F	Kufstein
1	1972	F	Innsbruck-Land
1	1937	M	Lienz
1	1954	F	Innsbruck-Stadt
1	1956	F	Innsbruck-Stadt
1	1969	M	Kitzbühel
1	1951	F	Kitzbühel
1	1948	F	Innsbruck-Stadt
1	1986	M	Innsbruck-Land
1	1961	M	Innsbruck-Land
1	1959	F	Schwaz
1	1994	M	Kitzbühel
0	1986	M	Innsbruck-Stadt
1	1991	M	Schwaz
1	1923	F	Innsbruck-Land
1	1950	F	Innsbruck-Stadt
1	1923	M	Landeck
1	1924	F	Innsbruck-Land
1	1966	F	Innsbruck-Land
1	1970	M	Innsbruck-Stadt
1	1943	M	Innsbruck-Land
1	1986	M	Kitzbühel
1	1960	F	Schwaz
1	1958	F	Kufstein
0	1979	M	Innsbruck-Stadt
1	1967	M	Innsbruck-Land
1	1971	M	Innsbruck-Stadt
1	1985	F	Kitzbühel
1	1967	F	Innsbruck-Land
1	1995	M	Schwaz
1	1974	M	Kufstein
1	1973	M	Kufstein
1	1982	M	Innsbruck-Stadt
1	1976	F	Innsbruck-Land
1	1946	F	Innsbruck-Stadt
1	1984	F	Imst
1	1987	F	Kufstein
1	1955	M	Innsbruck-Stadt
1	1984	F	Innsbruck-Land
1	1962	F	Kufstein
1	1920	M	Lienz
1	1957	F	Innsbruck-Stadt
1	1983	M	Innsbruck-Stadt
1	1969	M	Innsbruck-Stadt
1	1951	M	Reutte
1	1972	M	Innsbruck-Land
1	1921	F	Innsbruck-Land
1	1989	M	Innsbruck-Stadt
1	1968	F	Innsbruck-Stadt
1	1993	F	Schwaz
1	1993	M	Schwaz
1	1954	F	Innsbruck-Land
1	1968	F	Innsbruck-Stadt
1	1931	F	Imst
1	1959	F	Innsbruck-Land
1	1972	M	Kufstein
1	1977	M	Schwaz
1	1965	M	Innsbruck-Land
1	1971	M	Reutte
1	1995	F	Reutte
1	1968	F	Schwaz
1	1956	F	Innsbruck-Land
1	1958	F	Reutte
1	1972	F	Innsbruck-Stadt
1	1976	F	Kufstein
1	1936	M	Kufstein
1	1938	F	Schwaz
1	1961	F	Schwaz
1	1937	F	Innsbruck-Land
1	1953	F	Innsbruck-Land
1	1991	M	Kufstein
1	1968	F	Innsbruck-Stadt
1	1984	M	Schwaz
1	1943	F	Innsbruck-Land
1	1952	M	Innsbruck-Stadt
1	1986	M	Reutte
1	1940	M	Innsbruck-Land
1	1985	M	Innsbruck-Stadt
1	1991	M	Innsbruck-Land
1	1970	M	Lienz
1	1946	F	Kitzbühel
1	1936	F	Innsbruck-Land
1	1968	M	Innsbruck-Land
1	1970	F	Innsbruck-Stadt
1	1969	F	Innsbruck-Stadt
1	1970	M	Schwaz
1	1928	M	Innsbruck-Land
1	1961	M	Innsbruck-Stadt
1	1962	F	Landeck
1	1960	F	Lienz
1	1992	M	Landeck
1	1967	F	Innsbruck-Stadt
1	1952	M	Reutte
1	1962	F	Innsbruck-Land
1	1965	M	Kufstein
0	1996	M	Reutte
1	1964	F	Lienz
1	1936	M	Innsbruck-Stadt
1	1963	M	Innsbruck-Land
1	1935	F	Reutte
1	1983	F	Reutte
1	1990	F	Reutte
1	1963	F	Lienz
1	1979	F	Innsbruck-Land
1	1970	F	Innsbruck-Stadt
1	1973	F	Innsbruck-Land
1	1930	M	Kufstein
1	1970	M	Innsbruck-Land
1	1960	F	Kufstein
1	1924	F	Innsbruck-Land
1	1961	M	Innsbruck-Stadt
1	1945	M	Innsbruck-Land
1	1972	F	Imst
1	1939	M	Innsbruck-Land
1	1993	M	Reutte
1	1967	F	Innsbruck-Stadt
1	1943	F	Imst
1	1918	M	Innsbruck-Land
1	1953	M	Innsbruck-Land
1	1970	M	Lienz
0	1997	M	Lienz
1	1942	F	Kitzbühel
1	1977	F	Innsbruck-Land
1	1988	F	Innsbruck-Land
1	1987	F	Imst
1	1951		Innsbruck-Land
1	1989	F	Innsbruck-Stadt
1	1973	F	Kufstein
1	1939	F	Lienz
1	1992	M	Innsbruck-Land
1	1975	M	Imst
1	1977	F	Innsbruck-Stadt
1	1943	F	Landeck
1	1988	M	Kufstein
1	1921	F	Innsbruck-Land
1	1970	F	Innsbruck-Land
1	1991	M	Innsbruck-Land
1	1965	F	Schwaz
0	1989	F	Kufstein
1	1975	M	Innsbruck-Land
1	1967	F	Kitzbühel
1	1961	F	Innsbruck-Land
1	1949	F	Innsbruck-Stadt
1	1969	M	Imst
1	1936	F	Innsbruck-Stadt
1	1965	M	Innsbruck-Stadt
1	1967	M	Innsbruck-Stadt
1	1922	M	Lienz
1	1926	M	Innsbruck-Land
1	1956	M	Kufstein
0	1994	M	Innsbruck-Land
1	1942	M	Innsbruck-Land
1	1977	M	Innsbruck-Stadt
1	1961	M	Kufstein
1	1951	M	Kufstein
1	1937	F	Innsbruck-Land
1	1968	F	Schwaz
1	1986	F	Innsbruck-Land
1	1960	M	Innsbruck-Stadt
1	1924	M	Innsbruck-Stadt
1	1987	M	Kufstein
1	1944	F	Innsbruck-Land
1	1967	F	Innsbruck-Stadt
1	1969	F	Landeck
1	1963	F	Reutte
1	1955	F	Innsbruck-Stadt
1	1944	M	Reutte
1	1948	F	Innsbruck-Land
1	1957	F	Innsbruck-Land
1	1962	M	Lienz
1	1943	M	Innsbruck-Stadt
1	1980	M	Innsbruck-Stadt
1	1994	F	Kufstein
1	1928	F	Innsbruck-Stadt
1	1972	F	Schwaz
1	1920	F	Innsbruck-Stadt
1	1953	F	Kitzbühel
0	1986	M	Innsbruck-Stadt
1	1968	M	Schwaz
1	1992	M	Reutte
1	1983	F	Innsbruck-Land
1	1970	M	Innsbruck-Stadt
1	1923	F	Kufstein
1	1959	M	Kufstein
1	1991	F	Reutte
1	1922	F	Kufstein
1	1984	F	Innsbruck-Stadt
1	1964	F	Innsbruck-Stadt
1	1949	M	Landeck
1	1969	F	Innsbruck-Stadt
1	1977	F	Kitzbühel
1	1937	F	Innsbruck-Land
1	1974	M	Reutte
1	1984	M	Kufstein
1	1925	M	Kufstein
1	1981	M	Kufstein
1	1951	M	Innsbruck-Stadt
1	1938	M	Innsbruck-Land
1	1940	F	Kitzbühel
1	1969	F	Innsbruck-Stadt
1	1972	F	Innsbruck-Stadt
1	1974	F	Kufstein
1	1972	F	Schwaz
1	1983	F	Innsbruck-Stadt
1	1976		Innsbruck-Stadt
0	1993	F	Kitzbühel
1	1986	M	Innsbruck-Land
1	1971	F	Imst
1	1962	F	Innsbruck-Land
1	1937	M	Imst
1	1967	F	Innsbruck-Stadt
1	1952	F	Innsbruck-Land
1	1947	F	Kufstein
1	1966	M	Innsbruck-Stadt
1	1941	F	Kufstein
1	1967	M	Innsbruck-Stadt
1	1978	F	Schwaz
1	1941	M	Innsbruck-Stadt
1	1988	F	Schwaz
1	1987	M	Kufstein
1	1980	M	Innsbruck-Land
1	1964	F	Kufstein
1	1966	F	Innsbruck-Land
1	1973	F	Innsbruck-Land
1	1940	F	Innsbruck-Stadt
1	1991	F	Innsbruck-Stadt
1	1958	M	Innsbruck-Stadt
1	1944	M	Schwaz
1	1930	M	Lienz
1	1958	F	Innsbruck-Stadt
1	1994	F	Innsbruck-Stadt
1	1991	F	Innsbruck-Land
1	1976	M	Innsbruck-Stadt
1	1996	F	Lienz
1	1982	M	Innsbruck-Stadt
1	1954	M	Schwaz
1	1961	F	Innsbruck-Land
1	1946	F	Imst
1	1956	M	Kufstein
1	1971	F	Schwaz
1	1960	F	Innsbruck-Land
1	1964	M	Innsbruck-Stadt
1	1989	F	Innsbruck-Stadt
0	1988	M	Innsbruck-Land
0	1987	M	Schwaz
1	1970	F	Schwaz
1	1985	F	Reutte
1	1984	F	Innsbruck-Land
1	1946	M	Innsbruck-Land
0	1986	F	Kufstein
1	1947	M	Schwaz
1	1949	F	Innsbruck-Land
1	1991	F	Lienz
1	1965	F	Innsbruck-Stadt
1	1973	M	Innsbruck-Land
1	1919	M	Innsbruck-Land
1	1976	F	Innsbruck-Stadt
1	1960	F	Innsbruck-Land
1	1953	M	Innsbruck-Land
0	1981	M	Reutte
1	1961	M	Kitzbühel
1	1940	F	Innsbruck-Land
1	1957	F	Innsbruck-Stadt
1	1973	F	Innsbruck-Land
1	1941	F	Kitzbühel
1	1981	M	Lienz
1	1940	F	Innsbruck-Stadt
1	1959	F	Innsbruck-Land
1	1955	F	Innsbruck-Stadt
1	1970	F	Innsbruck-Stadt
0	1997	F	Innsbruck-Stadt
1	1978	M	Kitzbühel
1	1953	M	Innsbruck-Land
1	1944	M	Lienz
1	1975	F	Reutte
1	1954	F	Innsbruck-Land
1	1962	F	Schwaz
1	1971	M	Kufstein
0	1988	F	Kufstein
1	1970	M	Innsbruck-Stadt
1	1959	M	Schwaz
1	1956	M	Schwaz
1	1985	M	Kufstein
1	1979	F	Lienz
1	1962	F	Kitzbühel
1	1988	F	Imst
1	1954	F	Imst
1	1981	M	Innsbruck-Stadt
1	1969	F	Imst
1	1956	F	Innsbruck-Stadt
1	1988	F	Innsbruck-Land
1	1967	F	Innsbruck-Stadt
1	1941	F	Innsbruck-Stadt
1	1961	F	Innsbruck-Land
1	1979	M	Innsbruck-Stadt
1	1944	F	Innsbruck-Land
1	1927	F	Innsbruck-Stadt
1	1989	F	Innsbruck-Land
1	1972	F	Innsbruck-Land
1	1943	M	Lienz
1	1962	F	Innsbruck-Stadt
1	1997	M	Reutte
1	1958	M	Schwaz
1	1922	F	Innsbruck-Stadt
1	1946	M	Innsbruck-Stadt
0	1994	M	Kitzbühel
0	1990	F	Innsbruck-Stadt
1	1978	F	Innsbruck-Land
1	1939	M	Innsbruck-Stadt
1	1958	F	Kufstein
1	1951	M	Kufstein
1	1950	F	Innsbruck-Land
1	1940	M	Imst
1	1950	F	Kufstein
1	1959	F	Innsbruck-Stadt
1	1966	F	Landeck
1	1984	F	Lienz
1	1952	F	Imst
1	1965	F	Innsbruck-Land
1	1943	M	Lienz
1	1957	F	Kufstein
1	1951	F	Landeck
1	1958	M	Innsbruck-Stadt
1	1949	M	Innsbruck-Land
1	1966	M	Kufstein
1	1964	F	Innsbruck-Land
1	1995	F	Reutte
1	1976	F	Schwaz
1	1944	M	Innsbruck-Stadt
1	1977	M	Imst
1	1942	M	Innsbruck-Land
1	1992	M	Kufstein
1	1944	F	Innsbruck-Land
1	1980	F	Imst
1	1953	M	Innsbruck-Stadt
1	1952	M	Innsbruck-Land
1	1958	M	Innsbruck-Land
1	1985	F	Innsbruck-Land
1	1932	M	Kufstein
1	1955	M	Kitzbühel
1	1989	F	Schwaz
1	1959	F	Innsbruck-Land
1	1993	M	Innsbruck-Stadt
1	1977	M	Schwaz
1	1991	M	Kufstein
1	1981	M	Innsbruck-Land
0	1959	F	Innsbruck-Stadt
1	1995	M	Kufstein
1	1952	M	Innsbruck-Land
1	1920	M	Imst
1	1961		Kufstein
1	1985	F	Innsbruck-Stadt
1	1920	F	Innsbruck-Land
1	1982	M	Innsbruck-Land
1	1985	F	Kitzbühel
1	1976	F	Innsbruck-Land
1	1944	M	Imst
1	1959	M	Lienz
1	1957	M	Innsbruck-Stadt
1	1961	F	Innsbruck-Stadt
0	1997	M	Innsbruck-Stadt
1	1942	F	Kufstein
1	1937	F	Lienz
1	1967	M	Innsbruck-Stadt
1	1994	M	Reutte
1	1963	F	Innsbruck-Land
0	1964	F	Innsbruck-Land
1	1953	F	Innsbruck-Land
1	1969	F	Innsbruck-Land
1	1992	M	Innsbruck-Land
1	1948	M	Kufstein
1	1939	F	Innsbruck-Land
1	1932	F	Landeck
1	1921	F	Innsbruck-Stadt
1	1973	F	Innsbruck-Land
1	1967	M	Schwaz
1	1966	M	Innsbruck-Stadt
1	1964	F	Innsbruck-Stadt
0	1996	F	Innsbruck-Land
1	1961	M	Imst
1	1962	M	Innsbruck-Stadt
1	1987	M	Innsbruck-Stadt
1	1930	F	Schwaz
1	1948	F	Kufstein
0	1994	M	Landeck
1	1996	F	Innsbruck-Land
1	1963	F	Kufstein
1	1993	M	Innsbruck-Stadt
1	1958	M	Innsbruck-Land
1	1993	M	Lienz
1	1947	F	Innsbruck-Stadt
1	1930	M	Kitzbühel
1	1995	M	Reutte
1	1955	M	Landeck
0	1989	F	Innsbruck-Stadt
1	1941	M	Innsbruck-Land
1	1962	F	Imst
1	1952	M	Innsbruck-Stadt
1	1983	F	Kufstein
1	1968	F	Kufstein
1	1981	F	Imst
1	1946	F	Innsbruck-Stadt
1	1987	F	Kitzbühel
1	1922	F	Innsbruck-Stadt
1	1938	F	Innsbruck-Land
1	1972	F	Kitzbühel
1	1962	F	Landeck
1	1992	M	Lienz
1	1956	M	Reutte
1	1956	M	Kufstein
1	1994	M	Reutte
1	1997	F	Lienz
1	1962	F	Innsbruck-Stadt
1	1969	M	Innsbruck-Land
1	1948	F	Innsbruck-Stadt
1	1979	F	Schwaz
1	1962	M	Innsbruck-Stadt
1	1933	M	Innsbruck-Land
1	1934	F	Innsbruck-Land
1	1962	F	Innsbruck-Land
1	1995	F	Schwaz
1	1998	F	Kufstein
1	1957	M	Innsbruck-Land
1	1939	M	Innsbruck-Land
1	1956	M	Innsbruck-Stadt
1	1981	F	Innsbruck-Land
1	1965	F	Reutte
1	1958	F	Kufstein
1	1966	F	Innsbruck-Stadt
1	1972	F	Reutte
1	1969	M	Imst
1	1933	F	Kitzbühel
1	1926	F	Innsbruck-Land
0	1972	M	Innsbruck-Stadt
1	1930	F	Innsbruck-Stadt
1	1955	F	Kitzbühel
1	1961	M	Imst
1	1982	M	Innsbruck-Stadt
1	1976	M	Innsbruck-Land
1	1967	M	Innsbruck-Stadt
1	1983	M	Landeck
1	1966	M	Innsbruck-Land
1	1952	F	Innsbruck-Land
1	1954	F	Innsbruck-Land
1	1954	M	Reutte
1	1932	F	Innsbruck-Stadt
1	1985	F	Kufstein
1	1948	M	Imst
1	1960	F	Innsbruck-Stadt
1	1962	F	Innsbruck-Land
1	1921	M	Innsbruck-Land
1	1985	F	Innsbruck-Stadt
1	1956	M	Schwaz
1	1976	F	Innsbruck-Stadt
0	1980	F	Schwaz
1	1996	F	Reutte
0	1974	F	Lienz
1	1967	F	Schwaz
1	1976	F	Imst
1	1991	F	Lienz
1	1991	F	Innsbruck-Land
1	1964	M	Innsbruck-Stadt
1	1936	M	Innsbruck-Land
1	1954	M	Reutte
1	1971	M	Innsbruck-Stadt
1	1968	F	Kufstein
1	1962	M	Innsbruck-Stadt
1	1963	M	Innsbruck-Land
1	1947	M	Innsbruck-Land
0	1996	M	Reutte
1	1939	M	Schwaz
1	1940	M	Schwaz
1	1970	M	Schwaz
1	1961	F	Kufstein
1	1939	F	Kufstein
1	1990	M	Lienz
1	1996	M	Innsbruck-Land
1	1996	M	Kitzbühel
1	1963	F	Reutte
1	1962	M	Kufstein
1	1939	F	Reutte
1	1996	F	Reutte
1	1961	M	Lienz
1	1973	M	Innsbruck-Stadt
1	1952	F	Schwaz
1	1953	F	Kufstein
0	1997	F	Innsbruck-Land
1	1965	M	Landeck
1	1974	F	Innsbruck-Land
1	1957	M	Innsbruck-Land
1	1927	F	Kufstein
1	1987	F	Kitzbühel
1	1967	F	Innsbruck-Land
1	1930	F	Imst
1	1942	M	Landeck
1	1968	F	Schwaz
1	1961	F	Innsbruck-Land
1	1943	M	Kufstein
1	1958	M	Innsbruck-Stadt
1	1986	M	Innsbruck-Land
1	1956	M	Kufstein
1	1944	F	Innsbruck-Land
1	1997	M	Reutte
0	1997	F	Innsbruck-Land
1	1961	M	Innsbruck-Land
0	1984	M	Innsbruck-Land
1	1937	M	Innsbruck-Land
1	1948	F	Kufstein
0	1992	M	Innsbruck-Land
1	1968	F	Innsbruck-Stadt
1	1971	F	Innsbruck-Stadt
1	1927	F	Reutte
1	1967		Kufstein
1	1961	F	Kufstein
1	1955	M	Schwaz
1	1972	M	Innsbruck-Land
0	1992	M	Imst
1	1962	F	Imst
1	1938	F	Innsbruck-Land
1	1964	F	Kufstein
0	1965	F	Kitzbühel
1	1930	F	Innsbruck-Land
1	1976	M	Schwaz
1	1971	F	Innsbruck-Land
1	1949	M	Innsbruck-Land
1	1984	F	Reutte
1	1929	F	Kufstein
1	1979	F	Innsbruck-Stadt
1	1947	F	Innsbruck-Stadt
1	1993	F	Innsbruck-Land
1	1984	F	Kufstein
1	1959	F	Imst
1	1996	M	Imst
1	1957	F	Schwaz
1	1986	F	Schwaz
1	1917	M	Innsbruck-Land
1	1964	M	Kufstein
1	1971	M	Innsbruck-Land
1	1987	F	Lienz
1	1982	M	Innsbruck-Land
1	1963	M	Innsbruck-Land
1	1925	F	Landeck
1	1973	M	Innsbruck-Land
1	1963	M	Kitzbühel
1	1960	M	Kufstein
1	1955	M	Innsbruck-Land
1	1943	F	Innsbruck-Land
1	1972	F	Reutte
1	1953	M	Innsbruck-Stadt
1	1960	F	Innsbruck-Stadt
1	1969	M	Reutte
1	1925	F	Innsbruck-Land
1	1966	F	Kitzbühel
1	1960	F	Schwaz
1	1985	F	Innsbruck-Stadt
1	1986	F	Schwaz
1	1979	F	Landeck
1	1973	F	Landeck
1	1918	F	Innsbruck-Stadt
1	1951	M	Innsbruck-Stadt
1	1992	M	Innsbruck-Land
1	1962	M	Innsbruck-Stadt
1	1956	F	Innsbruck-Stadt
1	1989	M	Lienz
1	1979	F	Kitzbühel
1	1942	F	Reutte
1	1936	F	Kufstein
1	1993	M	Schwaz
1	1964	M	Innsbruck-Stadt
1	1974	M	Innsbruck-Stadt
1	1969	M	Schwaz
1	1951	F	Innsbruck-Stadt
1	1979	F	Innsbruck-Land
1	1988	F	Innsbruck-Stadt
1	1958	F	Innsbruck-Land
1	1973	F	Innsbruck-Land
1	1955	F	Reutte
1	1960	M	Landeck
1	1961	F	Kufstein
1	1975	F	Schwaz
1	1951	M	Innsbruck-Land
1	1977	F	Innsbruck-Stadt
1	1931	F	Imst
1	1961	F	Kufstein
1	1994	M	Innsbruck-Stadt
1	1987	M	Innsbruck-Stadt
1	1985	F	Schwaz
1	1931	M	Innsbruck-Stadt
1	1946	M	Innsbruck-Stadt
1	1989	M	Innsbruck-Stadt
1	1970	F	Innsbruck-Land
1	1989	F	Schwaz
1	1935	M	Kufstein
1	1987	M	Innsbruck-Stadt
1	1919	F	Innsbruck-Stadt
1	1967	F	Kitzbühel
1	1972	F	Lienz
1	1942	M	Innsbruck-Land
1	1989	F	Innsbruck-Land
1	1972	M	Innsbruck-Stadt
1	1962	M	Schwaz
1	1940	F	Innsbruck-Land
1	1959	F	Innsbruck-Land
1	1941	M	Reutte
1	1953	M	Innsbruck-Land
1	1986	F	Innsbruck-Land
1	1968	F	Schwaz
1	1984	M	Lienz
1	1964	F	Innsbruck-Stadt
1	1937	M	Kufstein
1	1967	M	Innsbruck-Land
1	1948	F	Innsbruck-Land
1	1948	F	Innsbruck-Land
1	1939	F	Innsbruck-Land
1	1966	F	Schwaz
1	1936	M	Imst
1	1956	F	Innsbruck-Land
1	1927	F	Innsbruck-Stadt
1	1941	F	Reutte
1	1958	M	Innsbruck-Land
1	1952	M	Reutte
1	1985	F	Schwaz
1	1985	F	Schwaz
1	1986	F	Schwaz
0	1986	F	Schwaz
1	1989	F	Kitzbühel
1	1941	F	Imst
1	1990	M	Innsbruck-Land
1	1949	F	Kufstein
1	1951	M	Kufstein
1	1986	M	Schwaz
1	1949	M	Schwaz
1	1986	F	Schwaz
1	1947	F	Innsbruck-Land
1	1987	F	Innsbruck-Land
1	1985	M	Schwaz
1	1984	M	Schwaz
1	1963	M	Kufstein
1	1988	F	Schwaz
1	1967	F	Innsbruck-Land
1	1953	F	Schwaz
1	1984	M	Schwaz
1	1988	M	Schwaz
1	1987	M	Schwaz
1	1986	F	Schwaz
1	1939	M	Kufstein
1	1969	M	Innsbruck-Land
1	1940	F	Innsbruck-Land
1	1960	M	Kufstein
1	1935	M	Schwaz
1	1988	M	Schwaz
1	1986	M	Schwaz
1	1986	M	Kufstein
1	1986	M	Schwaz
1	1986	M	Schwaz
1	1984	F	Schwaz
1	1986	F	Schwaz
1	1985	M	Schwaz
1	1985	M	Schwaz
1	1959	F	Schwaz
1	1988	F	Schwaz
1	1986	F	Schwaz
1	1984	M	Schwaz
1	1984	M	Schwaz
1	1984	M	Schwaz
1	1973	F	Lienz
1	1987	M	Schwaz
1	1950	M	Innsbruck-Land
1	1971	M	Lienz
1	1986	F	Schwaz
1	1965	F	Landeck
1	1988	F	Schwaz
1	1988	F	Schwaz
1	1971	F	Schwaz
1	1948	M	Innsbruck-Land
1	1934	F	Innsbruck-Land
1	1968	M	Innsbruck-Stadt
0	1958	F	Kufstein
1	1970	M	Innsbruck-Land
1	1973	F	Landeck
1	1936	F	Innsbruck-Stadt
1	1971	M	Innsbruck-Stadt
1	1929	F	Schwaz
1	1963	F	Kufstein
1	1982	F	Schwaz
1	1987	F	Innsbruck-Stadt
1	1976	F	Innsbruck-Land
0	1998	M	Innsbruck-Land
1	1982	M	Kufstein
1	1985	F	Schwaz
1	1986	F	Schwaz
1	1974	F	Imst
0	1993	F	Innsbruck-Stadt
1	1988	F	Schwaz
1	1984	F	Innsbruck-Stadt
1	1927	F	Innsbruck-Stadt
1	1977	M	Innsbruck-Stadt
1	1945	M	Kitzbühel
1	1934	F	Kufstein
1	1983	F	Innsbruck-Land
1	1991	M	Kufstein
1	1933	F	Innsbruck-Stadt
1	1987	F	Schwaz
1	1972	F	Innsbruck-Land
1	1986	F	Schwaz
1	1987	F	Schwaz
1	1987	F	Schwaz
1	1933	M	Innsbruck-Land
1	1994	M	Lienz
1	1957	F	Imst
0	1997	F	Lienz
1	1958	M	Innsbruck-Land
1	1984	F	Schwaz
1	1987	F	Schwaz
1	1974	F	Lienz
1	1954	M	Schwaz
1	1936	M	Imst
1	1975	F	Innsbruck-Stadt
1	1952	F	Innsbruck-Land
1	1977	M	Schwaz
1	1943	M	Innsbruck-Land
1	1988	M	Innsbruck-Land
1	1977	F	Kufstein
1	1973	M	Reutte
1	1980	M	Reutte
1	1990	M	Reutte
1	1984	F	Innsbruck-Stadt
1	1955	F	Innsbruck-Land
1	1976	F	Innsbruck-Stadt
1	1956	F	Innsbruck-Stadt
1	1985	F	Schwaz
1	1947	F	Kufstein
1	1995	M	Innsbruck-Land
1	1942	M	Innsbruck-Land
1	1991	M	Reutte
1	1946	F	Innsbruck-Land
1	1967	M	Innsbruck-Stadt
1	1981	M	Innsbruck-Land
1	1957	M	Innsbruck-Land
1	1953	M	Schwaz
1	1963	M	Innsbruck-Land
1	1930	M	Schwaz
1	1932	M	Schwaz
1	1941	F	Innsbruck-Stadt
1	1949	F	Innsbruck-Land
1	1948	F	Innsbruck-Stadt
1	1986	F	Schwaz
1	1957	M	Imst
1	1967	M	Schwaz
1	1925	M	Innsbruck-Stadt
1	1982	M	Innsbruck-Land
1	1991	M	Kufstein
1	1980	F	Lienz
1	1966	F	Kitzbühel
1	1951	M	Landeck
1	1993	M	Kufstein
1	1934	M	Innsbruck-Land
1	1926	M	Innsbruck-Stadt
1	1966	F	Innsbruck-Land
1	1992	M	Schwaz
1	1940	M	Innsbruck-Stadt
1	1919	F	Innsbruck-Stadt
1	1944	F	Innsbruck-Land
1	1939	F	Imst
1	1962	M	Innsbruck-Stadt
1	1968	M	Schwaz
1	1978	M	Innsbruck-Land
1	1968	M	Innsbruck-Stadt
1	1986	F	Schwaz
1	1946	F	Lienz
1	1965	M	Innsbruck-Stadt
1	1965	M	Kufstein
1	1971	F	Innsbruck-Stadt
1	1943	F	Innsbruck-Land
1	1979	M	Innsbruck-Stadt
1	1949	F	Kufstein
1	1976	F	Imst
1	1994	M	Reutte
1	1967	M	Innsbruck-Land
1	1971	F	Imst
1	1960	M	Innsbruck-Land
1	1921	M	Innsbruck-Land
1	1938	F	Innsbruck-Land
1	1930	F	Imst
1	1974	M	Innsbruck-Stadt
1	1981	M	Landeck
1	1920	F	Imst
1	1995	F	Reutte
1	1968	M	Innsbruck-Stadt
1	1951	F	Reutte
1	1974	M	Innsbruck-Land
1	1970	M	Innsbruck-Stadt
1	1972	F	Innsbruck-Land
1	1944	F	Schwaz
1	1968	F	Imst
1	1960	M	Kufstein
1	1961	M	Schwaz
1	1923	M	Innsbruck-Stadt
1	1937	M	Innsbruck-Land
1	1961	F	Innsbruck-Land
1	1952	F	Innsbruck-Stadt
1	1981	F	Innsbruck-Land
1	1967	M	Innsbruck-Land
1	1961	F	Kufstein
1	1964	F	Kufstein
1	1950	F	Kufstein
1	1966	F	Innsbruck-Land
1	1982	M	Innsbruck-Land
1	1931	M	Innsbruck-Land
0	1983	F	Innsbruck-Land
1	1994	F	Schwaz
1	1947	F	Innsbruck-Land
1	1955	F	Innsbruck-Stadt
1	1977	M	Innsbruck-Land
1	1973	M	Kitzbühel
1	1962	M	Lienz
1	1943	M	Reutte
1	1969	F	Innsbruck-Stadt
1	1964	F	Schwaz
1	1931	M	Innsbruck-Land
1	1929	F	Imst
1	1960	F	Kitzbühel
1	1964	F	Innsbruck-Land
1	1998	F	Imst
1	1975	F	Innsbruck-Land
0	1996	F	Innsbruck-Land
1	1970	F	Schwaz
1	1956	M	Lienz
1	1996	F	Innsbruck-Stadt
1	1970	M	Innsbruck-Land
1	1934	F	Innsbruck-Stadt
1	1921	M	Reutte
1	1959	F	Imst
1	1980	M	Innsbruck-Stadt
1	1965	F	Reutte
1	1959	M	Innsbruck-Stadt
0	1997	M	Innsbruck-Land
1	1958	F	Imst
1	1962	M	Innsbruck-Land
1	1993	M	Kufstein
1	1990	M	Reutte
1	1975	F	Kufstein
1	1929	M	Innsbruck-Stadt
1	1991	M	Schwaz
1	1971	F	Innsbruck-Stadt
1	1921	F	Innsbruck-Land
1	1938	F	Imst
1	1948	F	Innsbruck-Stadt
0	1985	M	Schwaz
1	1957	M	Innsbruck-Stadt
1	1929	M	Lienz
0	1996	F	Innsbruck-Land
1	1943	F	Innsbruck-Land
1	1940	M	Innsbruck-Stadt
1	1992	F	Innsbruck-Stadt
1	1971	M	Innsbruck-Land
1	1965	F	Schwaz
1	1987	F	Lienz
1	1963	M	Innsbruck-Stadt
1	1991	F	Kufstein
1	1945	F	Innsbruck-Land
1	1991	F	Reutte
1	1965	F	Innsbruck-Stadt
1	1933	F	Innsbruck-Stadt
1	1940	F	Kufstein
1	1950	F	Innsbruck-Land
1	1979	M	Innsbruck-Stadt
1	1960	F	Kufstein
1	1927	M	Innsbruck-Stadt
1	1948	M	Innsbruck-Land
1	1946	M	Imst
1	1989	F	Innsbruck-Stadt
1	1957	F	Innsbruck-Land
1	1964	F	Innsbruck-Land
1	1957	F	Innsbruck-Land
1	1957	F	Innsbruck-Stadt
1	1974	F	Innsbruck-Stadt
1	1977	F	Reutte
1	1967	F	Kufstein
1	1998	M	Innsbruck-Land
1	1973	F	Innsbruck-Stadt
1	1958	F	Schwaz
1	1954	F	Innsbruck-Land
1	1932	F	Innsbruck-Land
1	1988	F	Innsbruck-Stadt
1	1989	F	Kufstein
1	1955	M	Schwaz
1	1978	F	Kufstein
1	1933	F	Innsbruck-Stadt
1	1930	M	Innsbruck-Land
1	1961	F	Innsbruck-Stadt
1	1967	F	Innsbruck-Land
1	1964	F	Innsbruck-Land
1	1934	F	Innsbruck-Land
1	1973	F	Innsbruck-Land
1	1990	M	Kufstein
1	1996	M	Reutte
1	1935	M	Kitzbühel
1	1964	M	Innsbruck-Stadt
1	1990	F	Kitzbühel
1	1923	F	Innsbruck-Land
1	1979	F	Innsbruck-Land
1	1997	F	Schwaz
1	1974	F	Kitzbühel
1	1928	F	Schwaz
1	1959	M	Imst
1	1965	F	Schwaz
1	1931	F	Innsbruck-Land
1	1989	M	Kufstein
1	1952	F	Innsbruck-Stadt
1	1974	F	Innsbruck-Land
1	1996	F	Innsbruck-Land
1	1942	M	Kufstein
1	1991	M	Innsbruck-Land
1	1952	F	Schwaz
1	1942	M	Kitzbühel
1	1980	M	Kufstein
1	1982	M	Innsbruck-Land
1	1966	F	Innsbruck-Land
1	1958	F	Innsbruck-Stadt
1	1950	F	Kufstein
1	1925	F	Kitzbühel
1	1991	M	Landeck
1	1952	F	Innsbruck-Land
1	1966	M	Innsbruck-Stadt
1	1970	F	Kufstein
1	1961	F	Innsbruck-Land
1	1978	M	Kitzbühel
1	1961	M	Landeck
1	1970	F	Innsbruck-Stadt
1	1980	F	Innsbruck-Stadt
1	1961	M	Imst
1	1975	F	Innsbruck-Land
1	1964	F	Imst
1	1932	M	Schwaz
1	1957	F	Innsbruck-Stadt
1	1957	F	Innsbruck-Stadt
1	1952	M	Imst
1	1969	F	Innsbruck-Land
1	1960	M	Innsbruck-Land
1	1924	M	Kufstein
1	1994	F	Kufstein
1	1948	F	Kitzbühel
1	1989	M	Innsbruck-Stadt
1	1968	F	Innsbruck-Stadt
0	1984	M	Schwaz
1	1985	M	Schwaz
1	1987	M	Innsbruck-Stadt
1	1987	M	Innsbruck-Land
1	1941	M	Innsbruck-Stadt
1	1987	F	Schwaz
1	1986	M	Schwaz
1	1985	F	Schwaz
0	1984	F	Schwaz
1	1942	M	Kufstein
1	1964	F	Innsbruck-Stadt
1	1973	F	Innsbruck-Land
1	1986	M	Schwaz
1	1985	M	Schwaz
1	1985	M	Schwaz
1	1986	F	Innsbruck-Land
1	1986	M	Schwaz
1	1984	M	Innsbruck-Land
1	1945	M	Kufstein
1	1943	M	Imst
1	1986	F	Schwaz
1	1948	M	Schwaz
1	1984	M	Schwaz
1	1987	M	Schwaz
1	1987	M	Schwaz
1	1987	M	Schwaz
1	1988	M	Schwaz
1	1961	M	Innsbruck-Stadt
1	1929	M	Lienz
1	1935	F	Kufstein
1	1980	F	Lienz
1	1927	M	Kufstein
1	1951	M	Innsbruck-Stadt
1	1945	M	Innsbruck-Land
1	1966	M	Innsbruck-Stadt
1	1951	M	Schwaz
1	1987	F	Schwaz
1	1983		Schwaz
1	1983	F	Schwaz
1	1987	F	Innsbruck-Land
1	1971	F	Kufstein
1	1987	F	Schwaz
1	1984	F	Schwaz
1	1959	F	Innsbruck-Stadt
1	1969	F	Innsbruck-Stadt
1	1954	M	Innsbruck-Land
1	1980	F	Innsbruck-Land
1	1988	F	Schwaz
1	1959	M	Innsbruck-Land
1	1965	F	Innsbruck-Stadt
1	1998	M	Kitzbühel
1	1984	F	Schwaz
1	1985	M	Schwaz
1	1988	M	Schwaz
1	1988	M	Kufstein
1	1984	F	Schwaz
1	1985	F	Schwaz
1	1982	M	Kitzbühel
1	1987	F	Schwaz
1	1986	F	Kufstein
1	1987	F	Schwaz
1	1985	F	Schwaz
1	1985	F	Schwaz
1	1985	F	Schwaz
1	1954	F	Schwaz
1	1986	M	Schwaz
1	1986	F	Schwaz
1	1931	F	Innsbruck-Stadt
1	1976	F	Innsbruck-Land
1	1985	F	Schwaz
1	1984	F	Schwaz
0	1992	F	Kufstein
1	1969	M	Innsbruck-Stadt
1	1985	F	Schwaz
1	1986	F	Schwaz
1	1985	F	Schwaz
1	1985	F	Schwaz
1	1985	F	Schwaz
1	1957	F	Innsbruck-Stadt
0	1997	F	Innsbruck-Stadt
1	1993	M	Kitzbühel
1	1962	F	Kufstein
0	1968	M	Innsbruck-Stadt
1	1986	F	Schwaz
1	1936	M	Innsbruck-Land
1	1987	M	Schwaz
1	1987	F	Schwaz
1	1980	M	Innsbruck-Land
1	1985	M	Innsbruck-Stadt
0	1985	F	Innsbruck-Land
1	1986	M	Schwaz
1	1944	F	Kufstein
1	1986	F	Schwaz
1	1964	F	Innsbruck-Land
1	1996	M	Kufstein
1	1965	M	Kitzbühel
1	1972	F	Kufstein
0	1991	F	Innsbruck-Stadt
1	1959	M	Innsbruck-Land
1	1947	F	Innsbruck-Stadt
1	1974	M	Schwaz
1	1970	M	Innsbruck-Stadt
1	1974	M	Innsbruck-Land
1	1985	F	Schwaz
1	1985	F	Schwaz
1	1930	F	Kufstein
1	1983	F	Kitzbühel
1	1985	F	Schwaz
1	1985	F	Schwaz
1	1949	M	Kufstein
1	1971	F	Reutte
1	1981	M	Innsbruck-Stadt
1	1953	F	Innsbruck-Land
1	1921	F	Innsbruck-Land
1	1952	F	Innsbruck-Stadt
1	1997	M	Schwaz
0	1997	F	Kufstein
1	1977	M	Innsbruck-Stadt
1	1921	F	Innsbruck-Stadt
1	1953	F	Imst
1	1974	F	Imst
1	1935	F	Innsbruck-Land
1	1927	M	Kitzbühel
1	1952	M	Imst
1	1938	M	Innsbruck-Land
1	1941	F	Innsbruck-Stadt
1	1976	F	Kufstein
0	1998	F	Innsbruck-Stadt
0	1987	F	Schwaz
1	1988	F	Schwaz
1	1940	M	Kufstein
1	1971	F	Innsbruck-Stadt
1	1978	F	Innsbruck-Stadt
1	1934	F	Innsbruck-Land
1	1979	F	Innsbruck-Land
1	1988	F	Schwaz
0	1997	M	Lienz
1	1946	F	Innsbruck-Stadt
1	1976	F	Innsbruck-Land
1	1960	F	Innsbruck-Land
1	1950	M	Kufstein
1	1988	M	Innsbruck-Land
0	1998	M	Imst
1	1942	F	Kufstein
1	1940	M	Lienz
1	1963	F	Innsbruck-Land
1	1962	F	Schwaz
1	1938	M	Landeck
1	1971	M	Kufstein
1	1920	M	Innsbruck-Stadt
1	1995	F	Innsbruck-Stadt
1	1973	F	Innsbruck-Land
1	1958	F	Innsbruck-Land
1	1958	F	Innsbruck-Land
1	1961	M	Imst
1	1994	F	Innsbruck-Stadt
1	1990	F	Innsbruck-Land
1	1934	M	Innsbruck-Land
1	1982	M	Innsbruck-Stadt
1	1968	M	Innsbruck-Land
1	1995	M	Kufstein
1	1997	M	Innsbruck-Land
0	1986	M	Innsbruck-Stadt
1	1922	F	Kufstein
1	1967	M	Imst
1	1988	F	Innsbruck-Stadt
1	1939	M	Kufstein
1	1949	M	Schwaz
1	1990	F	Innsbruck-Stadt
1	1947	M	Innsbruck-Stadt
1	1987	M	Innsbruck-Stadt
1	1966	F	Innsbruck-Stadt
1	1932	M	Innsbruck-Stadt
1	1960	M	Kufstein
1	1973	F	Innsbruck-Stadt
1	1987	F	Innsbruck-Stadt
1	1985	F	Schwaz
1	1966	F	Schwaz
1	1969	F	Schwaz
1	1958	M	Schwaz
1	1951	F	Kufstein
1	1945	F	Innsbruck-Land
1	1951	M	Innsbruck-Land
1	1996	M	Innsbruck-Land
1	1968	M	Kufstein
1	1993	F	Innsbruck-Stadt
1	1949	M	Schwaz
1	1934	M	Innsbruck-Stadt
1	1986	F	Innsbruck-Stadt
1	1955	F	Innsbruck-Land
1	1964	F	Reutte
1	1952	M	Innsbruck-Stadt
1	1993	M	Schwaz
1	1930	M	Kufstein
1	1968	M	Schwaz
1	1941	F	Innsbruck-Land
1	1960	F	Kitzbühel
1	1976	M	Innsbruck-Land
1	1964	F	Kufstein
1	1971	M	Schwaz
1	1981	M	Innsbruck-Land
1	1991	M	Reutte
1	1944	F	Innsbruck-Stadt
1	1955	F	Innsbruck-Stadt
1	1959	F	Innsbruck-Stadt
1	1952	F	Innsbruck-Land
1	1958	F	Innsbruck-Stadt
1	1978	F	Innsbruck-Land
1	1975	F	Innsbruck-Stadt
1	1940	M	Imst
1	1945	F	Landeck
1	1945	F	Innsbruck-Stadt
1	1940	F	Reutte
1	1980	F	Innsbruck-Land
1	1997	M	Innsbruck-Stadt
1	1975	M	Innsbruck-Stadt
1	1981	F	Innsbruck-Land
1	1997	M	Lienz
1	1967	F	Innsbruck-Stadt
1	1964	F	Kufstein
1	1960	F	Landeck
1	1959	M	Landeck
1	1944	F	Innsbruck-Stadt
1	1938	F	Kitzbühel
1	1995	M	Innsbruck-Stadt
1	1965	M	Innsbruck-Stadt
1	1962	M	Innsbruck-Land
1	1988	M	Innsbruck-Stadt
1	1983	M	Kufstein
1	1949	F	Schwaz
1	1967	M	Kufstein
1	1948	M	Kitzbühel
1	1924	M	Innsbruck-Land
1	1990	M	Innsbruck-Stadt
1	1991	M	Kufstein
1	1997	F	Innsbruck-Stadt
1	1974	M	Schwaz
1	1986	F	Schwaz
1	1960	M	Reutte
1	1995	M	Schwaz
1	1955	M	Kufstein
1	1978	F	Innsbruck-Stadt
1	1978	M	Imst
1	1989	M	Innsbruck-Stadt
1	1953	M	Innsbruck-Stadt
1	1927	M	Lienz
1	1954	M	Innsbruck-Land
1	1959	M	Imst
1	1966	F	Kufstein
1	1981	F	Innsbruck-Land
1	1969	M	Schwaz
1	1984	F	Lienz
1	1997	M	Lienz
1	1957	M	Kufstein
1	1983	M	Schwaz
1	1985	M	Schwaz
0	1985	M	Schwaz
1	1969	F	Innsbruck-Stadt
1	1928	F	Lienz
1	1968	F	Innsbruck-Stadt
1	1919	F	Imst
1	1980	M	Schwaz
1	1991	M	Schwaz
1	1920	F	Kufstein
1	1976	F	Innsbruck-Land
1	1978	F	Innsbruck-Stadt
1	1927	F	Schwaz
1	1932	F	Lienz
1	1942	M	Innsbruck-Stadt
1	1964	M	Innsbruck-Stadt
1	1956	M	Innsbruck-Stadt
1	1939	M	Innsbruck-Stadt
1	1972	F	Innsbruck-Stadt
1	1954	F	Kitzbühel
1	1944	F	Kitzbühel
1	1939	M	Kufstein
1	1943	F	Kufstein
1	1966	F	Kufstein
1	1922	F	Innsbruck-Land
1	1965	M	Innsbruck-Land
1	1974	M	Innsbruck-Land
1	1971	F	Kufstein
1	1959	M	Innsbruck-Stadt
1	1966	F	Innsbruck-Stadt
1	1975	F	Innsbruck-Stadt
1	1959	F	Schwaz
1	1944	F	Innsbruck-Land
1	1956	F	Innsbruck-Land
1	1961	F	Kitzbühel
1	1921	F	Landeck
1	1939	M	Lienz
1	1965	M	Innsbruck-Land
1	1972	M	Landeck
1	1942	F	Innsbruck-Land
1	1957	F	Innsbruck-Stadt
1	1965	F	Innsbruck-Land
1	1931	M	Imst
1	1924	F	Innsbruck-Stadt
1	1955	F	Schwaz
1	1974	F	Innsbruck-Stadt
1	1946	F	Kufstein
1	1957	M	Innsbruck-Land
1	1940	F	Innsbruck-Land
1	1956	F	Innsbruck-Land
1	1995	M	Kitzbühel
1	1975	F	Schwaz
1	1945	F	Innsbruck-Land
1	1993	M	Landeck
0	1997	F	Schwaz
1	1950	M	Innsbruck-Stadt
1	1933	M	Innsbruck-Stadt
1	1942	F	Innsbruck-Stadt
1	1970	M	Kufstein
1	1974	F	Innsbruck-Land
1	1977	M	Innsbruck-Stadt
1	1944	M	Reutte
1	1962	M	Innsbruck-Land
1	1947	F	Innsbruck-Land
1	1963	F	Kufstein
1	1957	F	Reutte
0	1986	F	Innsbruck-Stadt
1	1933	M	Kufstein
1	1964	F	Innsbruck-Stadt
1	1932	M	Innsbruck-Land
1	1973	F	Schwaz
1	1959	F	Innsbruck-Land
1	1953	F	Schwaz
1	1963	M	Lienz
1	1944	M	Innsbruck-Land
1	1961	F	Kitzbühel
1	1946	M	Innsbruck-Stadt
1	1973	M	Innsbruck-Land
1	1937	M	Imst
1	1950	F	Imst
1	1948	F	Kufstein
1	1940	F	Schwaz
1	1968	F	Innsbruck-Stadt
1	1988	F	Kufstein
1	1993	M	Innsbruck-Stadt
1	1954	F	Innsbruck-Stadt
0	1976	F	Kitzbühel
1	1937	F	Innsbruck-Stadt
1	1967	F	Innsbruck-Land
1	1979	F	Kufstein
1	1932	F	Kufstein
1	1995	M	Landeck
1	1938	F	Innsbruck-Land
1	1956	M	Innsbruck-Land
1	1929	F	Innsbruck-Land
1	1981	M	Innsbruck-Stadt
0	1995	M	Kufstein
0	1986	F	Schwaz
1	1941	F	Innsbruck-Land
0	1992	F	Kufstein
1	1964	F	Reutte
1	1963	M	Innsbruck-Land
1	1958	M	Kufstein
1	1971	F	Innsbruck-Stadt
1	1983	F	Kitzbühel
1	1953	F	Innsbruck-Land
1	1931	F	Innsbruck-Stadt
1	1961	F	Innsbruck-Land
1	1982	M	Kufstein
1	1971	F	Innsbruck-Land
1	1986	M	Innsbruck-Stadt
1	1993	M	Innsbruck-Stadt
1	1936	F	Schwaz
1	1983	M	Schwaz
1	1920	F	Innsbruck-Land
1	1987	F	Kufstein
1	1997	M	Imst
1	1981	F	Reutte
1	1989	F	Innsbruck-Land
1	1951	F	Kufstein
1	1976	F	Landeck
1	1931	M	Innsbruck-Stadt
1	1939	M	Schwaz
1	1976	F	Kufstein
1	1957	M	Innsbruck-Land
1	1971	F	Innsbruck-Land
0	1987	M	Innsbruck-Land
1	1963	F	Innsbruck-Stadt
1	1961	F	Schwaz
1	1968	M	Kitzbühel
1	1977	F	Innsbruck-Land
1	1976	F	Schwaz
[truncated: 11,061 more rows]

## Sheet: Minimal dataset surv
Sex	Age at diagnosis	Year of diagnosis	Birth cohort	District
W	48	2009	1961	Reutte
W	35	2009	1974	Innsbruck-Stadt
M	22	2010	1988	Innsbruck-Land
M	27	2011	1984	Kitzbühel
W	36	2011	1975	Innsbruck-Stadt
W	18	2011	1992	Lienz
W	24	2011	1986	Innsbruck-Land
M	27	1900	1983	Innsbruck-Land
W	23	2011	1988	Lienz
M	16	2011	1995	Schwaz
M	22	2011	1988	Kufstein
M	46	2011	1964	Innsbruck-Land
M	25	2011	1986	Imst
W	25	1900	1985	Imst
M	20	2011	1990	Reutte
M	24	1900	1987	Innsbruck-Land
M	12	2011	1998	Innsbruck-Stadt
M	25	1900	1986	Innsbruck-Land
M	28	2011	1983	Innsbruck-Stadt
W	6	2012	2005	Innsbruck-Land
M	5	2012	2007	Kitzbühel
W	1	2012	2010	Kitzbühel
M	17	2013	1995	Kitzbühel
M	15	2013	1997	Kitzbühel
M	11	2013	2001	Kitzbühel
M	9	2013	2003	Kitzbühel
M	17	2013	1995	Kitzbühel
W	11	2013	2001	Kitzbühel
M	29	2013	1983	Kitzbühel
W	10	2013	2002	Kitzbühel
W	16	2013	1997	Kitzbühel
M	14	2013	1999	Kitzbühel
M	12	2013	2001	Kitzbühel
M	8	2013	2004	Kitzbühel
M	8	2013	2005	Innsbruck-Land
W	13	1900	2000	Innsbruck-Stadt
M	19	2013	1994	Schwaz
W	27	2014	1986	Innsbruck-Land
M	34	2014	1979	Imst
M	5	2014	2008	Innsbruck-Land
M	14	2014	1999	Innsbruck-Land
M	0	2014	2013	Innsbruck-Land
M	12	2014	2002	Innsbruck-Land
M	22	2014	1991	Innsbruck-Stadt
W	23	2014	1990	Innsbruck-Stadt
W	32	2014	1981	Innsbruck-Stadt
M	25	2014	1989	Innsbruck-Stadt
W	35	2014	1978	Innsbruck-Stadt
M	37	2014	1976	Innsbruck-Stadt
W	20	2014	1994	Wien 10.,Favoriten
W	22	2014	1991	Innsbruck-Stadt
M	45	1900	1969	Innsbruck-Stadt
W	24	2015	1990	Innsbruck-Stadt
M	23	2015	1991	Innsbruck-Stadt
W	32	2016	1984	Reutte
M	42	2016	1974	Reutte
W	35	2016	1981	Reutte
W	15	2017	2002	Kufstein
W	14	2017	2003	Kufstein
M	36	2017	1981	Kufstein
W	6	2017	2011	Kufstein
W	8	1900	2009	Kufstein
M	30	2017	1987	Kufstein
W	6	2017	2011	Kufstein
W	11	2017	2006	Kufstein
M	9	2017	2008	Kufstein
M	21	2017	1996	Kufstein
M	23	2018	1995	Innsbruck-Stadt
M	7	2019	2011	Kufstein
W	38	2019	1981	Kufstein
M	32	2019	1986	Kufstein
W	1	2019	2017	Kufstein
M	29	2019	1989	Kufstein
W	11	2019	2008	Kufstein
W	11	2019	2008	Imst
W	28	2019	1991	Kufstein
W	9	2019	2009	Kufstein

## Sheet: MDS MCV coverage data
Birth cohort	MCV dose 1	MCV dose 2	denominator population
1999	6715	5496	7091
2000	6695	5669	7149
2001	6354	5506	6783
2002	6501	5706	6973
2003	6396	5568	6844
2004	6541	5774	7038
2005	6416	5850	6911
2006	6319	5780	6905
2007	6017	5473	6651
2008	6096	5266	6703
2009	5920	5223	6636
2010	6079	5331	6819
2011	5884	4984	6724
2012	5986	4645	6917
2013	4453	1651	6962
